# Supplementary material for: Evaluating the efficacy of thoracoscopy and talc poudrage versus pleurodesis using talc slurry (TAPPS trial): protocol of an open-label randomised controlled trial
Source: HighWire-hosted journal article supplement (doi:10.1136/bmjopen-2014-007045), 2014-11-01
Supplement: bmjopen-2014-007045supp_appendix1.pdf [file bmjopen-2014-007045supp_appendix1.pdf]

## **APPENDIX 1 – TAPPS RECRUITING CENTRES AND PRINCIPAL INVESTIGATORS**

|                                                            |                                      |
|------------------------------------------------------------|--------------------------------------|
| <b>Southmead Hospital, North Bristol</b>                   | Dr Nick Maskell (Chief Investigator) |
| <b>Churchill Hospital, Oxford</b>                          | Dr Najib Rahman                      |
| <b>Nottingham City Hospital, Nottingham</b>                | Dr Wei Shen Lim                      |
| <b>Medway Maritime Hospital, Kent</b>                      | Dr Gihan Hettiarachchi               |
| <b>King's Mill Hospital, Sutton-in-Ashfield</b>            | Dr Mark Roberts                      |
| <b>Bristol Royal Infirmary, Bristol</b>                    | Dr Roland Jenkins                    |
| <b>Addenbrooke's Hospital, Cambridge</b>                   | Dr Pasupathy Sivasothy               |
| <b>Musgrove Park Hospital, Taunton</b>                     | Dr Justin Pepperell                  |
| <b>Royal Preston Hospital, Preston</b>                     | Dr Mohammed Munavvar                 |
| <b>Wythenshawe Hospital, Manchester</b>                    | Dr Mohamed Al-Aloul                  |
| <b>St. Thomas' Hospital, London</b>                        | Dr Alex West                         |
| <b>Doncaster Royal Infirmary, Doncaster</b>                | Dr Moe Kyi                           |
| <b>Glenfield Hospital, Leicester</b>                       | Dr Neil Martin                       |
| <b>University Hospital of North Tees, Stockton-on-Tees</b> | Dr Richard Harrison                  |
| <b>Aintree Hospital, Liverpool</b>                         | Dr Biswajit Chakrabarti              |
| <b>Southern General Hospital, Glasgow</b>                  | Dr Kevin Blyth                       |
| <b>Queen Elizabeth Hospital, Birmingham</b>                | Dr Benjamin Sutton                   |
| <b>Milton Keynes Hospital, Milton Keynes</b>               | Dr Aji Kavidasan                     |
