# Supplementary material for: Evaluating the efficacy of thoracoscopy and talc poudrage versus pleurodesis using talc slurry (TAPPS trial): protocol of an open-label randomised controlled trial
Source: HighWire-hosted journal article supplement (doi:10.1136/bmjopen-2014-007045), 2014-11-01

APPENDIX 7 – TREATMENT FLOW CHART FOR POUDRAGE ARM

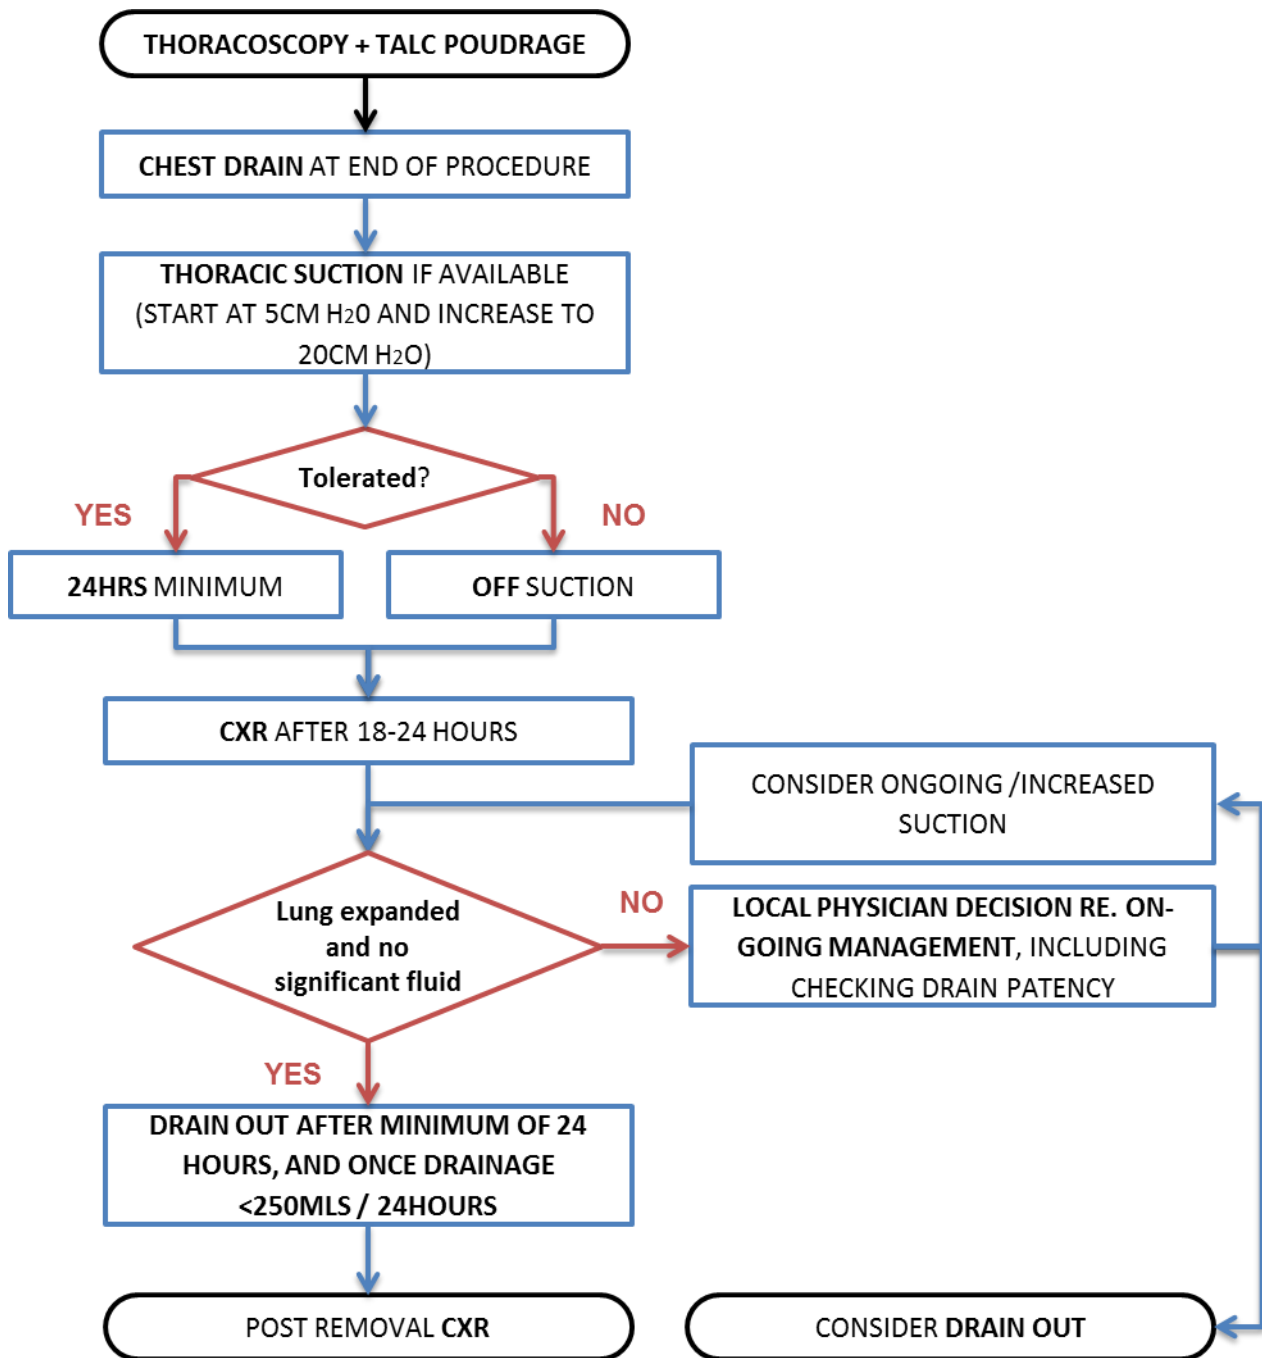

Supplement: bmjopen-2014-007045supp_appendix7.pdf [file bmjopen-2014-007045supp_appendix7.pdf]
