# Supplementary material for: Evaluating the efficacy of thoracoscopy and talc poudrage versus pleurodesis using talc slurry (TAPPS trial): protocol of an open-label randomised controlled trial
Source: HighWire-hosted journal article supplement (doi:10.1136/bmjopen-2014-007045), 2014-11-01
Supplement: bmjopen-2014-007045supp_appendix8.pdf [file bmjopen-2014-007045supp_appendix8.pdf]

## APPENDIX 8 – OVERVIEW OF PROTOCOL AMENDMENTS

| Amendment number | Details of significant alterations to protocol                                                                                                                                                                                                                               | Resulting protocol version and date |
|------------------|------------------------------------------------------------------------------------------------------------------------------------------------------------------------------------------------------------------------------------------------------------------------------|-------------------------------------|
| 1                | <ul style="list-style-type: none"> <li>• Clarified various sections in the protocol</li> <li>• Altered the time window for a patient to consider trial entry</li> <li>• Updated flow charts</li> <li>• Clarified the use of suction and telephone follow ups.</li> </ul>     | <b>2.0</b><br><b>01/12/2012</b>     |
| 2                |                                                                                                                                                                                                                                                                              |                                     |
| 3                | <ul style="list-style-type: none"> <li>• Adjustments to the follow up visit windows</li> <li>• Administrative details were updated throughout the protocol.</li> </ul>                                                                                                       | <b>3.0</b><br><b>14/08/2013</b>     |
| 4                | <ul style="list-style-type: none"> <li>• Change of time allowance between the randomisation and the study procedure from 24 to 72 hours</li> <li>• Minor admin changes and clarifications to the protocol.</li> </ul>                                                        | <b>4.0</b><br><b>26/09/2013</b>     |
| 5                |                                                                                                                                                                                                                                                                              |                                     |
| 6                | <ul style="list-style-type: none"> <li>• Edited the safety reporting section of the protocol</li> <li>• Updated administrative details throughout the protocol</li> <li>• Added appendix 6</li> </ul>                                                                        | <b>5.0</b><br><b>01/06/2014</b>     |
| 7                | <ul style="list-style-type: none"> <li>• Updated secondary endpoints following ratification of statistical analysis plan version 1.0</li> <li>• Updated study end date</li> <li>• Updated trial recruitment centre and PI details</li> <li>• Minor clarifications</li> </ul> | <b>6.0</b><br><b>06/10/2014</b>     |
