# Supplementary figures and images for: Evaluating the efficacy of thoracoscopy and talc poudrage versus pleurodesis using talc slurry (TAPPS trial): protocol of an open-label randomised controlled trial
Source: HighWire-hosted journal article supplement (doi:10.1136/bmjopen-2014-007045), 2014-11-01

APPENDIX 5 – TREATMENT FLOW CHART FOR SLURRY ARM

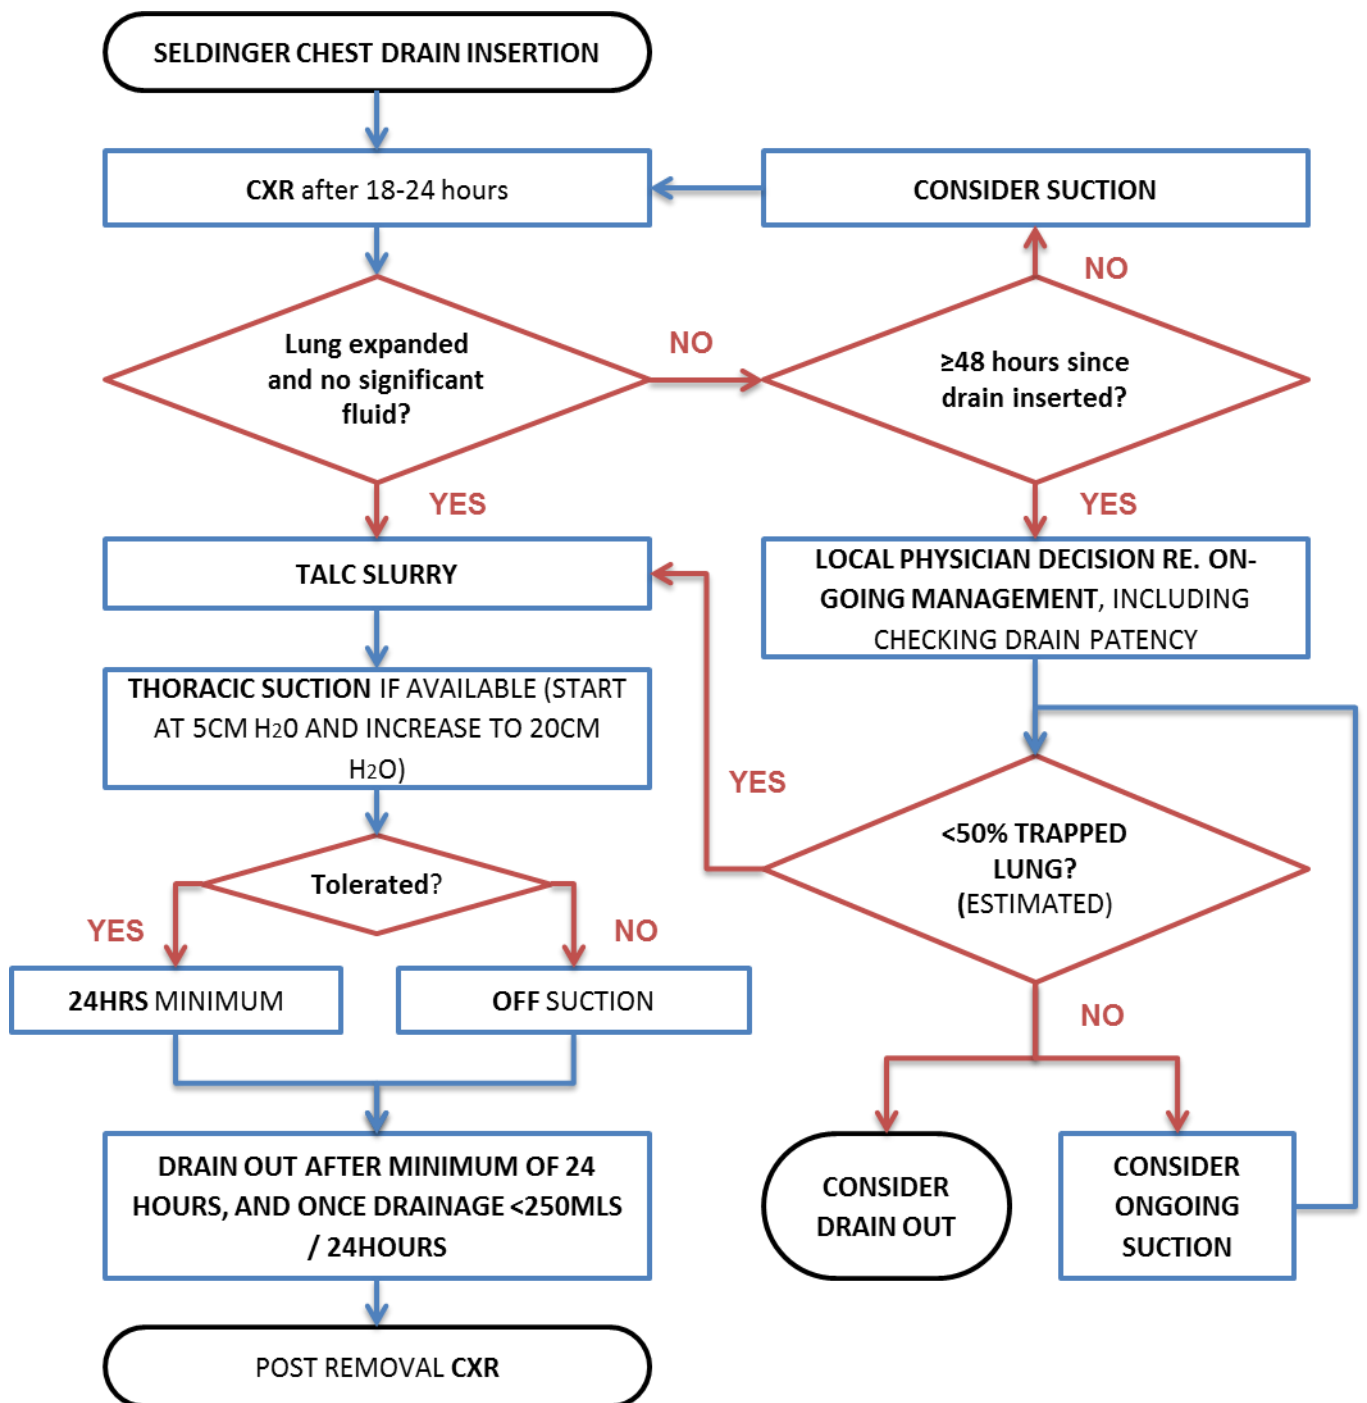

Supplement: bmjopen-2014-007045supp_appendix5.pdf [file bmjopen-2014-007045supp_appendix5.pdf]
